# Supplementary material for: Ideal cardiovascular health status and risk of cardiovascular disease and all-cause mortality: over a decade of follow-up in the Tehran lipid and glucose study
Source: PubMed Central journal article supplement (PMC9386047; doi:10.3389/fcvm.2022.898681), 2022-08-04
Supplement: Data_Sheet_1.pdf [file Data_Sheet_1.pdf]

Supplementary Table 1. Baseline Characteristics by Global Cardiovascular Health Status

|                                                                                                                                                                                                                                                                                            | Global Cardiovascular Health Status* |                   |                      |                  | P-value |
|--------------------------------------------------------------------------------------------------------------------------------------------------------------------------------------------------------------------------------------------------------------------------------------------|--------------------------------------|-------------------|----------------------|------------------|---------|
|                                                                                                                                                                                                                                                                                            | Overall (n=1755)                     | Poor (n=449)      | Intermediate (n=929) | Ideal (n=377)    |         |
| <b>Continuous variables, Mean ± SD</b>                                                                                                                                                                                                                                                     |                                      |                   |                      |                  |         |
| Age (year)                                                                                                                                                                                                                                                                                 | 45.6±10.8                            | 49.5±10.7         | 45.6±10.6            | 41.1±9.8         | < 0.001 |
| BMI (kg/m <sup>2</sup> )                                                                                                                                                                                                                                                                   | 28.0±4.6                             | 29.9±4.1          | 28.2±4.3             | 25.2±4.2         | < 0.001 |
| SBP (mmHg)                                                                                                                                                                                                                                                                                 | 114.3±17.4                           | 125.0±15.6        | 113.6±17.2           | 103.3±11.7       | < 0.001 |
| DBP (mmHg)                                                                                                                                                                                                                                                                                 | 75.2±10.5                            | 81.6±9.4          | 74.8±10.2            | 68.4±7.4         | < 0.001 |
| FPG (mg/dL)                                                                                                                                                                                                                                                                                | 88.0 (82.0-95.0)                     | 96.0 (88.0-111.0) | 88.0 (82.0-93.0)     | 84.0 (79.5-89.0) | < 0.001 |
| Total cholesterol (mg/dL)                                                                                                                                                                                                                                                                  | 195.4±37.9                           | 216.1±36.4        | 195.3±37.1           | 170.9±25.1       | < 0.001 |
| HDL cholesterol (mg/dL)                                                                                                                                                                                                                                                                    | 42.1±10.2                            | 39.8±9.6          | 41.9±10.0            | 44.9±10.5        | < 0.001 |
| <b>Categorical variables, number (%)</b>                                                                                                                                                                                                                                                   |                                      |                   |                      |                  |         |
| Sex (male)                                                                                                                                                                                                                                                                                 | 788(44.9)                            | 260(57.9)         | 420(45.2)            | 108(28.6)        | < 0.001 |
| <b>Educational level</b>                                                                                                                                                                                                                                                                   |                                      |                   |                      |                  |         |
| ≤6                                                                                                                                                                                                                                                                                         | 372(21.2)                            | 138(30.7)         | 190(20.5)            | 44(11.7)         | < 0.001 |
| 6-12                                                                                                                                                                                                                                                                                       | 986(56.2)                            | 225(50.1)         | 529(56.9)            | 232(61.5)        | < 0.001 |
| >12                                                                                                                                                                                                                                                                                        | 397(22.9)                            | 86(19.2)          | 210(22.6)            | 101(26.8)        | < 0.001 |
| Low Physical activity                                                                                                                                                                                                                                                                      | 639 (36.4)                           | 241 (53.7)        | 338 (36.4)           | 60 (15.9)        | < 0.001 |
| Current smoking,                                                                                                                                                                                                                                                                           | 233 (13.3)                           | 98 (21.8)         | 115 (12.4)           | 20 (5.3)         | <0.001  |
| <b>Marital status</b>                                                                                                                                                                                                                                                                      |                                      |                   |                      |                  |         |
| Married                                                                                                                                                                                                                                                                                    | 1542(87.9)                           | 392(87.3)         | 814(87.6)            | 336(89.1)        | < 0.001 |
| Widowed + Divorced                                                                                                                                                                                                                                                                         | 116(6.6)                             | 44(9.8)           | 58(6.2)              | 14(3.7)          | < 0.001 |
| Single                                                                                                                                                                                                                                                                                     | 97(5.5)                              | 13(2.9)           | 57(6.1)              | 27(7.2)          | < 0.001 |
| Glucose lowering drug use, yes                                                                                                                                                                                                                                                             | 82 (4.7)                             | 52(11.6)          | 27(2.9)              | 3(0.8)           | < 0.001 |
| Anti-hypertensive drug use, yes                                                                                                                                                                                                                                                            | 76(4.3)                              | 39(8.7)           | 34(3.7)              | 3(0.8)           | < 0.001 |
| Lipid-lowering drug use, yes                                                                                                                                                                                                                                                               | 73(4.2)                              | 44(9.8)           | 29(3.1)              | 0(0)             | < 0.001 |
| Family history of CVD, yes                                                                                                                                                                                                                                                                 | 393(77.6)                            | 105(23.4)         | 197(21.2)            | 91(24.1)         | 0.434   |
| T2DM                                                                                                                                                                                                                                                                                       | 133(7.6)                             | 87(19.4)          | 43(4.6)              | 3(0.8)           | < 0.001 |
| Values are mean ± SD or n (%). *Defined according to the number of ideal metrics: 0 to 2 (poor), 3 to 4 (intermediate), and 5 to 7 (ideal). BMI, Body mass index; SBP, Systolic blood pressure; DBP, diastolic blood pressure; FPG, Fasting plasma glucose; T2DM, Type 2 diabetes mellitus |                                      |                   |                      |                  |         |

Supplementary Table 2. Hazard ratios of intermediate and ideal CVH for Cardiovascular disease: Analysis by Metric

|                              | n/N      | Model 1                 |                  | Model 2                 |                  |
|------------------------------|----------|-------------------------|------------------|-------------------------|------------------|
|                              |          | HR (95%CI)              | P-value          | HR (95%CI)              | P-value          |
| <b>Smoking status</b>        | 163/1755 |                         |                  |                         |                  |
| - Poor                       | 30/233   | 1.00                    |                  | 1.00                    |                  |
| - Intermediate               | 20/161   | 0.69 (0.39-1.23)        | 0.214            | 0.72 (0.40-1.25)        | 0.712            |
| Ideal                        | 113/1361 | 0.73 (0.48-1.12)        | 0.736            | 0.75 (0.48-1.15)        | 0.750            |
| <b>Body mass index</b>       | 163/1755 |                         |                  |                         |                  |
| - Poor                       | 59/529   | 1.00                    |                  | 1.00                    |                  |
| - Intermediate               | 70/769   | <b>0.59 (0.41-0.85)</b> | <b>0.004</b>     | <b>0.62 (0.43-0.89)</b> | <b>0.011</b>     |
| Ideal                        | 34/457   | <b>0.37 (0.23-0.58)</b> | <b>0.373</b>     | <b>0.39 (0.24-0.61)</b> | <b>&lt;0.001</b> |
| <b>Physical activity</b>     | 163/1755 |                         |                  |                         |                  |
| - Poor                       | 59/639   | 1.00                    |                  | 1.00                    |                  |
| - Intermediate               | 40/399   | 1.03 (0.68-1.54)        | 0.883            | 1.02 (0.68-1.53)        | 0.915            |
| Ideal                        | 64/717   | 0.96 (0.67-1.37)        | 0.832            | 0.92 (0.64-1.31)        | 0.648            |
| <b>Total cholesterol</b>     | 163/1755 |                         |                  |                         |                  |
| - Poor                       | 37/215   | 1.00                    |                  | 1.00                    |                  |
| - Intermediate               | 66/569   | <b>0.65 (0.43-0.98)</b> | <b>0.043</b>     | <b>0.66 (0.44-0.99)</b> | <b>0.049</b>     |
| Ideal                        | 60/971   | <b>0.41 (0.27-0.63)</b> | <b>&lt;0.001</b> | <b>0.42 (0.27-0.64)</b> | <b>&lt;0.001</b> |
| <b>Blood pressure</b>        | 163/1755 |                         |                  |                         |                  |
| - Poor                       | 48/228   | 1.00                    |                  | 1.00                    |                  |
| - Intermediate               | 70/601   | 0.78 (0.54-1.13)        | 0.196            | 0.79 (0.54-1.15)        | 0.222            |
| Ideal                        | 45/926   | <b>0.48 (0.31-0.74)</b> | <b>0.001</b>     | <b>0.48 (0.31-0.75)</b> | <b>0.001</b>     |
| <b>Fasting blood glucose</b> | 163/1755 |                         |                  |                         |                  |
| - Poor                       | 22/110   | 1.00                    |                  | 1.00                    |                  |
| - Intermediate               | 34/221   | 0.83 (0.48-1.43)        | 0.515            | 0.91 (0.52-1.56)        | 0.908            |
| Ideal                        | 107/1424 | <b>0.52 (0.33-0.83)</b> | <b>0.006</b>     | <b>0.55 (0.35-0.89)</b> | <b>0.014</b>     |
| <b>Healthy diet</b>          | 163/1755 |                         |                  |                         |                  |
| - Poor                       | 25/402   | 1.00                    |                  | 1.00                    |                  |
| - Intermediate               | 134/1258 | 1.26 (0.82-1.95)        | 0.279            | 1.30 (0.84-2.00)        | 0.234            |
| Ideal                        | 4/95     | 0.98 (0.48-1.98)        | 0.966            | 1.05 (0.52-2.14)        | 0.878            |

**CVH, Cardiovascular health**

n/N: Number of CVD events /number of subjects by level of each metric

The Hazard ratios and 95% CIs of each metric were estimated in separate Cox proportional hazard regression model

Model 1: Adjusted for sex and age

Model 2: Further adjusted for educational level, marital status, family history of CVD, and prevalent CVD (for all-cause mortality).

**Supplementary Table 3. Hazard ratios (HRs) of cardiovascular disease for each components of healthy diet metric**

|                                  | n/N      | Model 1          |         | Model 2          |         |
|----------------------------------|----------|------------------|---------|------------------|---------|
|                                  |          | HRs (95%CI)      | P-value | HR (95%CI)       | P-value |
| <b>Whole grains</b>              | 163/1755 |                  |         |                  |         |
| <b>Poor</b>                      | 97/1115  | 1                |         |                  |         |
| <b>Ideal</b>                     | 66/640   | 0.88 (0.64-1.21) | 0.451   | 0.89 (0.65-1.23) | 0.513   |
| <b>Fruits and vegetables</b>     | 163/1755 |                  |         |                  |         |
| <b>Poor</b>                      | 67/692   | 1                |         | 1                |         |
| <b>Ideal</b>                     | 96/1063  | 0.81 (0.59-1.10) | 0.190   | 0.83 (0.60-1.13) | 0.251   |
| <b>Fish</b>                      | 163/1755 |                  |         |                  |         |
| <b>Poor</b>                      | 136/1472 | 1                |         | 1                |         |
| <b>Ideal</b>                     | 27/283   | 0.91 (0.60-1.38) | 0.188   | 0.94 (0.62-1.44) | 0.801   |
| <b>Sugar sweetened beverages</b> | 163/1755 |                  |         |                  |         |
| <b>Poor</b>                      | 3/61     | 1                |         | 1                |         |
| <b>Ideal</b>                     | 160/1694 | 1.35 (0.43-4.28) | 0.600   | 1.46 (0.46-4.62) | 0.516   |
| <b>Sodium</b>                    | 163/1755 |                  |         |                  |         |
| <b>Poor</b>                      | 155/1690 | 1                |         | 1                |         |
| <b>Ideal</b>                     | 8/65     | 1.22 (0.60-2.48) | 0.580   | 1.23 (0.60-2.52) | 0.555   |

**Ideal defined as at least 4.5 cups/day of fruits and vegetables; at least two 3.5-ounce servings/week of fish; <1500 mg/day of sodium; ≤ 36 ounces/week of sugar sweetened beverages (SSBs); and at least three 1-ounce servings/ day of whole grains**

**n/N: Number of CVD events /number of subjects by level of each metric**

**The Hazard ratios and 95% CIs of each metric were estimated in separate Cox proportional hazard regression model**

**Model 1: Adjusted for sex and age**

**Model 2: Further adjusted for educational level, marital status, family history of CVD, and prevalent CVD (for all-cause mortality).**

**Supplementary Table 4. Cox proportional hazard for incident cardiovascular disease and all-cause mortality (per one additional metric ideal CVH)**

|                                         | Cardiovascular Disease   |                         | All-cause Mortality     |                         |
|-----------------------------------------|--------------------------|-------------------------|-------------------------|-------------------------|
|                                         | Model 1                  | Model 2                 | Model 1                 | Model 2                 |
| <b>Global cardiovascular health</b>     | <b>0.72 (0.64-0.81)*</b> | <b>0.72 (0.64-0.81)</b> | <b>0.75 (0.61-0.93)</b> | <b>0.76 (0.62-0.94)</b> |
| <b>Behavioral cardiovascular health</b> | <b>0.78 (0.65-0.94)</b>  | <b>0.78 (0.64-0.94)</b> | 0.74 (0.54-1.02)        | 0.75 (0.55-1.03)        |
| <b>Biological cardiovascular health</b> | <b>0.62 (0.52-0.74)</b>  | <b>0.63 (0.52-0.75)</b> | <b>0.72 (0.53-0.97)</b> | <b>0.73 (0.54-0.99)</b> |

CVH, Cardiovascular health

\*Hazard ratios (95% confidence interval)

Model 1: Adjusted for sex and age

Model 2: Further adjusted for educational level, marital status, family history of CVD, and prevalent CVD (for all-cause mortality).

**Supplementary Table 5. Multivariable hazard ratios (95% CI) of association between global cardiovascular health categories and cardiovascular disease**

|                                                                                                                                                                                                                                                                                                                                                                                    | Cardiovascular disease  |                         |
|------------------------------------------------------------------------------------------------------------------------------------------------------------------------------------------------------------------------------------------------------------------------------------------------------------------------------------------------------------------------------------|-------------------------|-------------------------|
|                                                                                                                                                                                                                                                                                                                                                                                    | Model 1                 | Model 2                 |
| <b>Global Cardiovascular health*</b>                                                                                                                                                                                                                                                                                                                                               |                         |                         |
| - Poor                                                                                                                                                                                                                                                                                                                                                                             | 1.00                    | 1.00                    |
| - Intermediate                                                                                                                                                                                                                                                                                                                                                                     | <b>0.56 (0.40-0.76)</b> | <b>0.56 (0.41-0.77)</b> |
| - Ideal                                                                                                                                                                                                                                                                                                                                                                            | <b>0.28 (0.15-0.52)</b> | <b>0.28 (0.16-0.53)</b> |
| Age, year                                                                                                                                                                                                                                                                                                                                                                          | <b>1.08 (1.06-1.09)</b> | <b>1.07 (1.06-1.09)</b> |
| Female (male as reference)                                                                                                                                                                                                                                                                                                                                                         | <b>0.50 (0.36-0.71)</b> | <b>0.48 (0.34-0.69)</b> |
| <b>Educational level</b>                                                                                                                                                                                                                                                                                                                                                           |                         |                         |
| - >12                                                                                                                                                                                                                                                                                                                                                                              |                         | <b>1.00</b>             |
| - 6-12                                                                                                                                                                                                                                                                                                                                                                             |                         | <b>1.15 (0.72-1.84)</b> |
| - <6                                                                                                                                                                                                                                                                                                                                                                               |                         | <b>1.51 (0.91-2.51)</b> |
| <b>Marital status</b>                                                                                                                                                                                                                                                                                                                                                              |                         |                         |
| - Married                                                                                                                                                                                                                                                                                                                                                                          |                         | <b>1.00</b>             |
| - Divorced + Widowed                                                                                                                                                                                                                                                                                                                                                               |                         | <b>1.01 (0.57-1.76)</b> |
| - Single                                                                                                                                                                                                                                                                                                                                                                           |                         | 0.26 (0.04-1.92)        |
| Family history of CVD, yes                                                                                                                                                                                                                                                                                                                                                         |                         | <b>1.31 (0.92-1.84)</b> |
| T2DM, yes                                                                                                                                                                                                                                                                                                                                                                          |                         |                         |
| <b>CVD: Cardiovascular disease; T2DM: Type 2 diabetes mellitus</b><br><b>*Defined according to the number of ideal metrics: 0 to 2 (poor), 3 to 4 (intermediate) and 5 to 6 (ideal).</b><br><b>Model 1: Adjusted for sex and age</b><br><b>Model 2: Further adjusted for educational level, marital status, family history of CVD, and prevalent CVD (for all-cause mortality)</b> |                         |                         |

**Supplementary Table 6. Multivariable hazard ratios (95% CI) of association between global cardiovascular health categories and All- cause mortality**

|                                                                                                                                                                                                                                                                                                                                                                                                   | All-cause mortality     |                         |
|---------------------------------------------------------------------------------------------------------------------------------------------------------------------------------------------------------------------------------------------------------------------------------------------------------------------------------------------------------------------------------------------------|-------------------------|-------------------------|
|                                                                                                                                                                                                                                                                                                                                                                                                   | Model 1                 | Model 2                 |
| <b>Global cardiovascular health*</b>                                                                                                                                                                                                                                                                                                                                                              |                         |                         |
| - Poor                                                                                                                                                                                                                                                                                                                                                                                            | 1.00                    | 1.00                    |
| - Intermediate                                                                                                                                                                                                                                                                                                                                                                                    | 0.61 (0.36-1.06)        | 0.64 (0.37-1.11)        |
| - Ideal                                                                                                                                                                                                                                                                                                                                                                                           | <b>0.31 (0.11-0.89)</b> | <b>0.32 (0.11-0.93)</b> |
| Age, year                                                                                                                                                                                                                                                                                                                                                                                         | <b>1.10 (1.08-1.12)</b> | <b>1.09 (1.06-1.12)</b> |
| Female (male as reference)                                                                                                                                                                                                                                                                                                                                                                        | <b>0.42 (0.23-0.75)</b> | <b>0.36 (0.19-0.69)</b> |
| <b>Educational level</b>                                                                                                                                                                                                                                                                                                                                                                          |                         |                         |
| - >12                                                                                                                                                                                                                                                                                                                                                                                             |                         | <b>1.00</b>             |
| - 6-12                                                                                                                                                                                                                                                                                                                                                                                            |                         | 0.90 (0.39-2.11)        |
| - <6                                                                                                                                                                                                                                                                                                                                                                                              |                         | 1.80 (0.77-4.18)        |
| <b>Marital status</b>                                                                                                                                                                                                                                                                                                                                                                             |                         |                         |
| - Married                                                                                                                                                                                                                                                                                                                                                                                         |                         | 1.00                    |
| - Divorced + Widowed                                                                                                                                                                                                                                                                                                                                                                              |                         | 0.89 (0.34-2.29)        |
| - Single                                                                                                                                                                                                                                                                                                                                                                                          |                         | 1.31 (0.17-9.93)        |
| Family history of CVD, yes                                                                                                                                                                                                                                                                                                                                                                        |                         | 0.94 (0.49-1.79)        |
| T2DM, yes                                                                                                                                                                                                                                                                                                                                                                                         |                         |                         |
| <b>CVD: Cardiovascular disease; T2DM: Type 2 diabetes mellitus</b><br><b>*Defined according to the number of ideal metrics: 0 to 2 (poor), 3 to 4 (intermediate) and 5 to 6 (ideal)</b><br><b>Model 1: Adjusted for sex and age</b><br><b>Model 2: Further adjusted for educational level, marital status, family history of CVD, history of CVD, and prevalent CVD (for all-cause mortality)</b> |                         |                         |
